# Supplementary material for: Utilizing a Population-Genetic Framework to Test for Gene-Environment Interactions between Zebrafish Behavior and Chemical Exposure
Source: MDPI journal article supplement (doi:10.3390/toxics10120769), 2022-12-09
Supplement: s1 [file s1]

# Supplementary Materials: Utilizing a Population-Genetic Framework to Test for Gene-Environment Interactions between Zebrafish Behavior and Chemical Exposure

Preethi Thunga, Lisa Truong, Yvonne Rericha, Jane La Du, Mackenzie Morshead, Robyn L. Tanguay and David M. Reif

**Table S1.** Results from fitting LMM to Control data

| Random effect variances   Control group           |                                          |                    |
|---------------------------------------------------|------------------------------------------|--------------------|
| Group                                             | Variance                                 | Standard Deviation |
| Genes                                             | 1.506e+08 ( $\sigma^2_{\text{Gene}}$ )   | 12270.70           |
| Family ID                                         | 1.661e+02 ( $\sigma^2_{\text{Family}}$ ) | 12.89              |
| Residual                                          | 1.348e+07 ( $\sigma^2_{\text{E}}$ )      | 3671.80            |
| Random effect parameter estimates   Control group |                                          |                    |
| Group                                             | Estimate                                 |                    |
| Genes ( $\beta_1$ )                               | 3.34                                     |                    |
| Family ID ( $\beta_2$ )                           | 0.0035                                   |                    |
| Error ( $\epsilon$ )                              | 3671.80                                  |                    |
| Fixed effect parameter estimates   Control group  |                                          |                    |
| Group                                             | Estimate                                 | Standard Error     |
| Intercept                                         | 553.92                                   | 84.65              |

**Table S2.** Results from fitting LMM to Medium exposure group (16.4 uM PFHxA).

| Random effect variances   Medium group           |                                          |                    |
|--------------------------------------------------|------------------------------------------|--------------------|
| Group                                            | Variance                                 | Standard Deviation |
| Genes                                            | 1.743e+08 ( $\sigma^2_{\text{Gene}}$ )   | 13202.70           |
| Family ID                                        | 3.063e+02 ( $\sigma^2_{\text{Family}}$ ) | 17.50              |
| Residual                                         | 1.809e+07 ( $\sigma^2_{\text{E}}$ )      | 4252.80            |
| Random effect parameter estimates   Medium group |                                          |                    |
| Group                                            | Estimate                                 |                    |
| Genes ( $\beta_1$ )                              | 3.10                                     |                    |
| Family ID ( $\beta_2$ )                          | 0.0041                                   |                    |
| Error ( $\epsilon$ )                             | 4252.8                                   |                    |
| Fixed effect parameter estimates   Medium group  |                                          |                    |
| Group                                            | Estimate                                 | Standard Error     |
| Intercept                                        | 564.44                                   | 91.24              |

**Table S3.** Results from fitting LMM to High exposure group (74.8 uM PFHxA).

| Random effect variances   High group           |                                          |                    |
|------------------------------------------------|------------------------------------------|--------------------|
| Group                                          | Variance                                 | Standard Deviation |
| Genes                                          | 1.849e+08 ( $\sigma^2_{\text{Gene}}$ )   | 13596.95           |
| Family ID                                      | 2.479e+00 ( $\sigma^2_{\text{Family}}$ ) | 1.57               |
| Residual                                       | 1.159e+07 ( $\sigma^2_{\text{E}}$ )      | 3404.12            |
| Random effect parameter estimates   High group |                                          |                    |
| Group                                          | Estimate                                 |                    |

|                                                      |                 |                       |
|------------------------------------------------------|-----------------|-----------------------|
| Genes ( $\beta_1$ )                                  | 3.99            |                       |
| Family ID ( $\beta_2$ )                              | 0.00046         |                       |
| Error ( $\epsilon$ )                                 | 3404.12         |                       |
| <b>Fixed effect parameter estimates   High group</b> |                 |                       |
| <i>Group</i>                                         | <i>Estimate</i> | <i>Standard Error</i> |
| Intercept                                            | 565.09          | 93.47                 |
